# Supplementary material for: A Bioactive Compound-Loaded Zinc-Aminoclay Encapsulated, Pickering Emulsion System for Treating Acne-Inducing Microbes
Source: MDPI journal article supplement (doi:10.3390/ijms24119669), 2023-06-02
Supplement: s1 [file s1]

# **Bio-active compound entrapped zinc-aminoclay loaded W/O Pickering emulsion for acne-inducing microbial treatment**

**Seong-Hyeon Kim<sup>1</sup>, In-Sun Bae<sup>2</sup>, Hyun Uk Lee<sup>3</sup>, Ju-Young Moon<sup>4\*</sup>, Young-Chul Lee<sup>1\*</sup>**

<sup>1</sup> Department of BioNano Technology, Gachon University, 1342 Seongnam-Daero, Sujeong-Gu, Seongnam-Si, Gyeonggi-do 13120, Korea; shaera@gachon.ac.kr (S.-H.K.), dreamdb@gachon.ac.kr (Y.-C.L.)

<sup>2</sup> Swsonaki inc., Gwangyang frontier-valley 3rd, 30 Gaseok-Ro, Seo-Gu, Incheon, Korea; swsonaki@naver.com (I.-S.B.)

<sup>3</sup> Research center for Materials Analysis, Korea Basic Science Institute, Daejeon 34133, Korea; leeho@kbsi.re.kr (H.U.L.)

<sup>4</sup> Department of Beauty Design Management, Hansung University, 116 Samseongyoro-16gil, Seoul 02876, Korea; bora7033@naver.com (J.-Y.M.)

\*Correspondence: bora7033@naver.com (J.-Y.M.); dreamdb@gachon.ac.kr (Y.-C.L.)

**Keywords:** Pickering emulsion, acne, antimicrobial, extended release, Zinc-aminoclay (ZnAC)

*Opuntia humifusa*

(SUPPLEMENTARY INFORMATION)

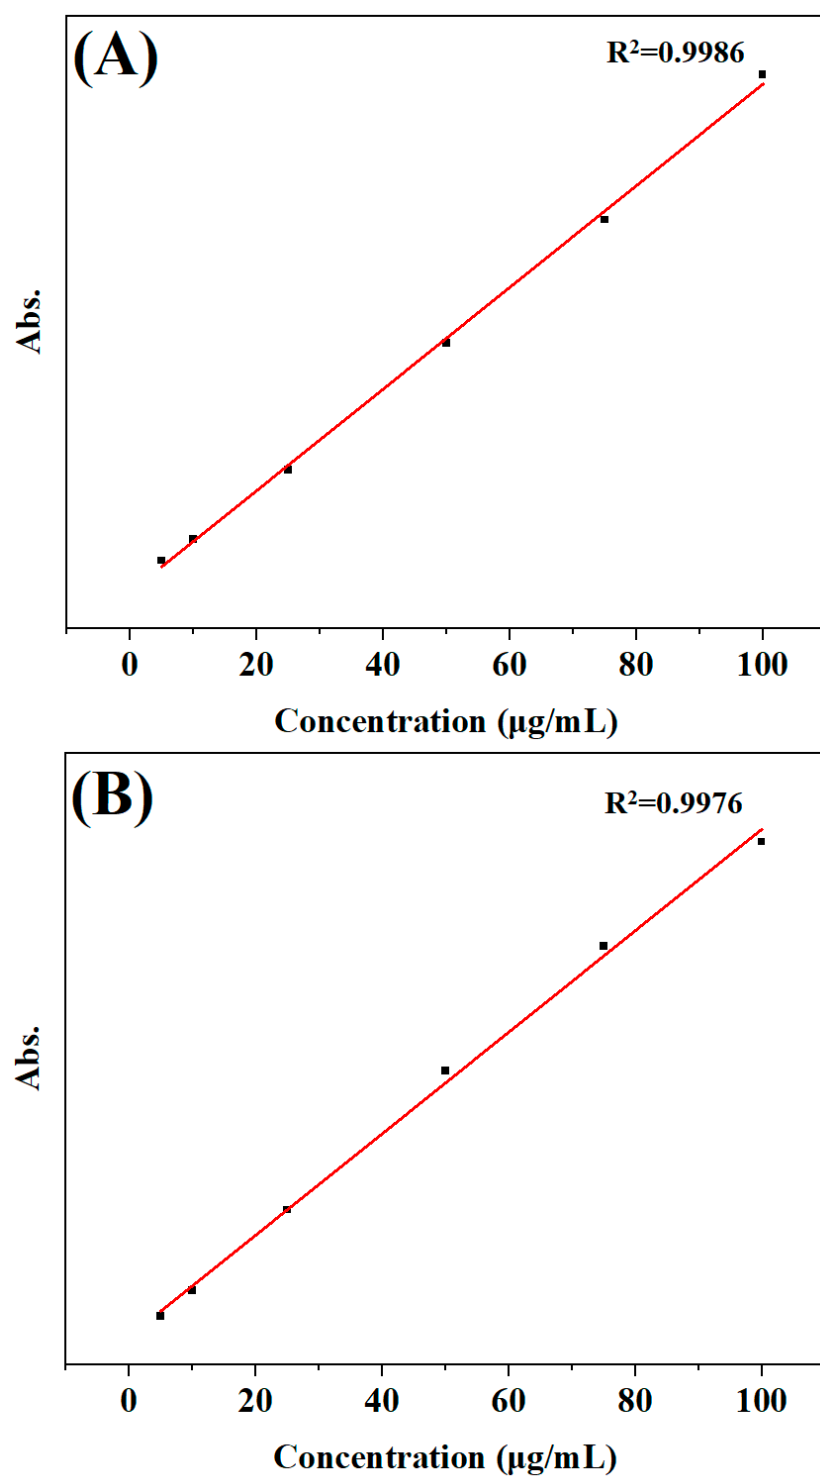

**Figure S1.** Standard curve of gallic acid for entrapment efficiency measurement of MA-OHE/ZnAC (A); and MA-OHE/ZnAC PE (B).

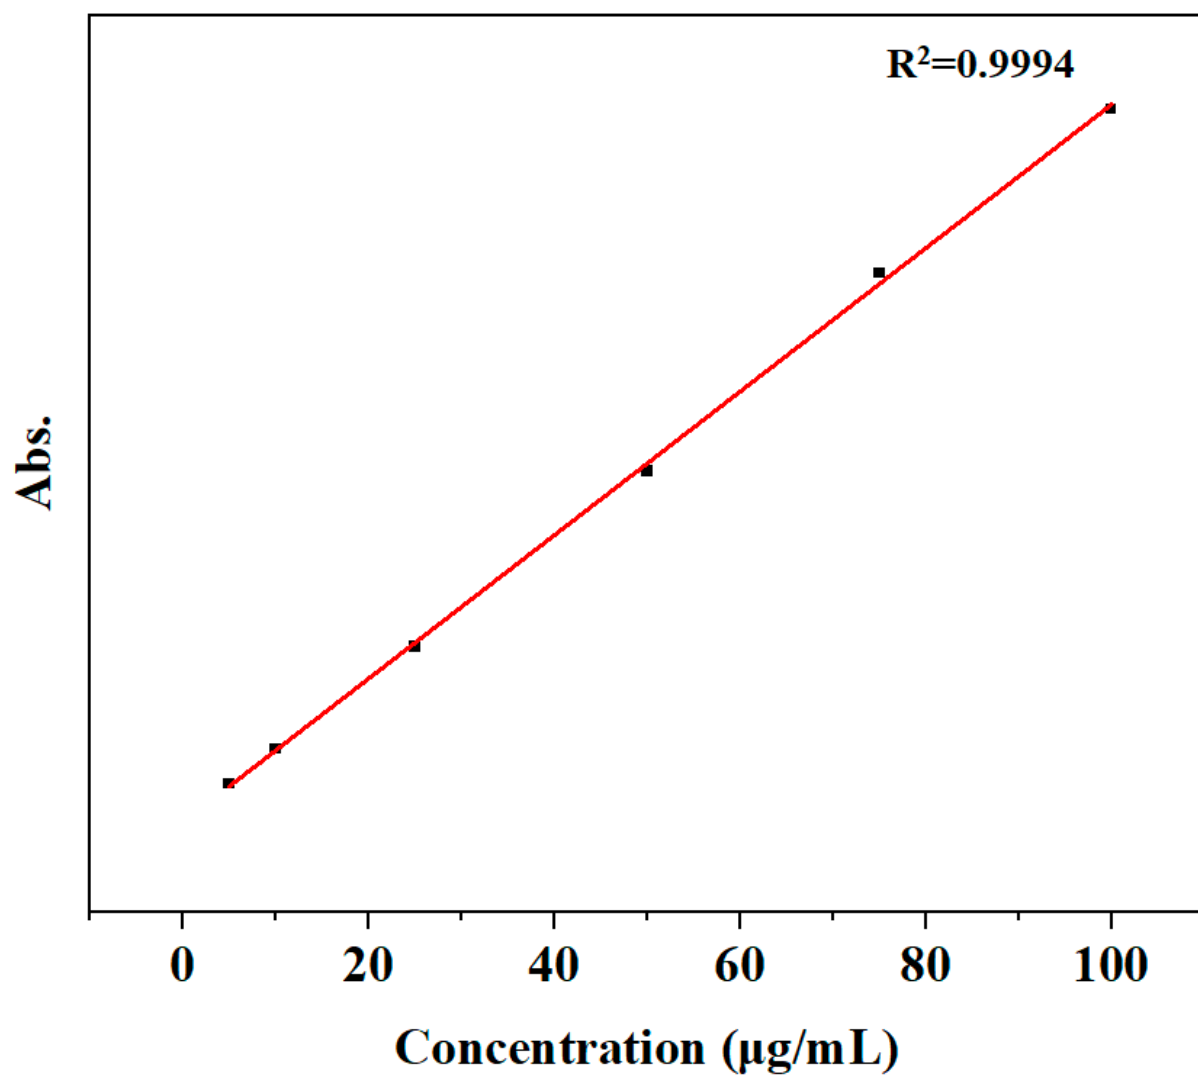

**Figure S2.** Standard curve of gallic acid for dissolution test of MA-OHE/ZnAC

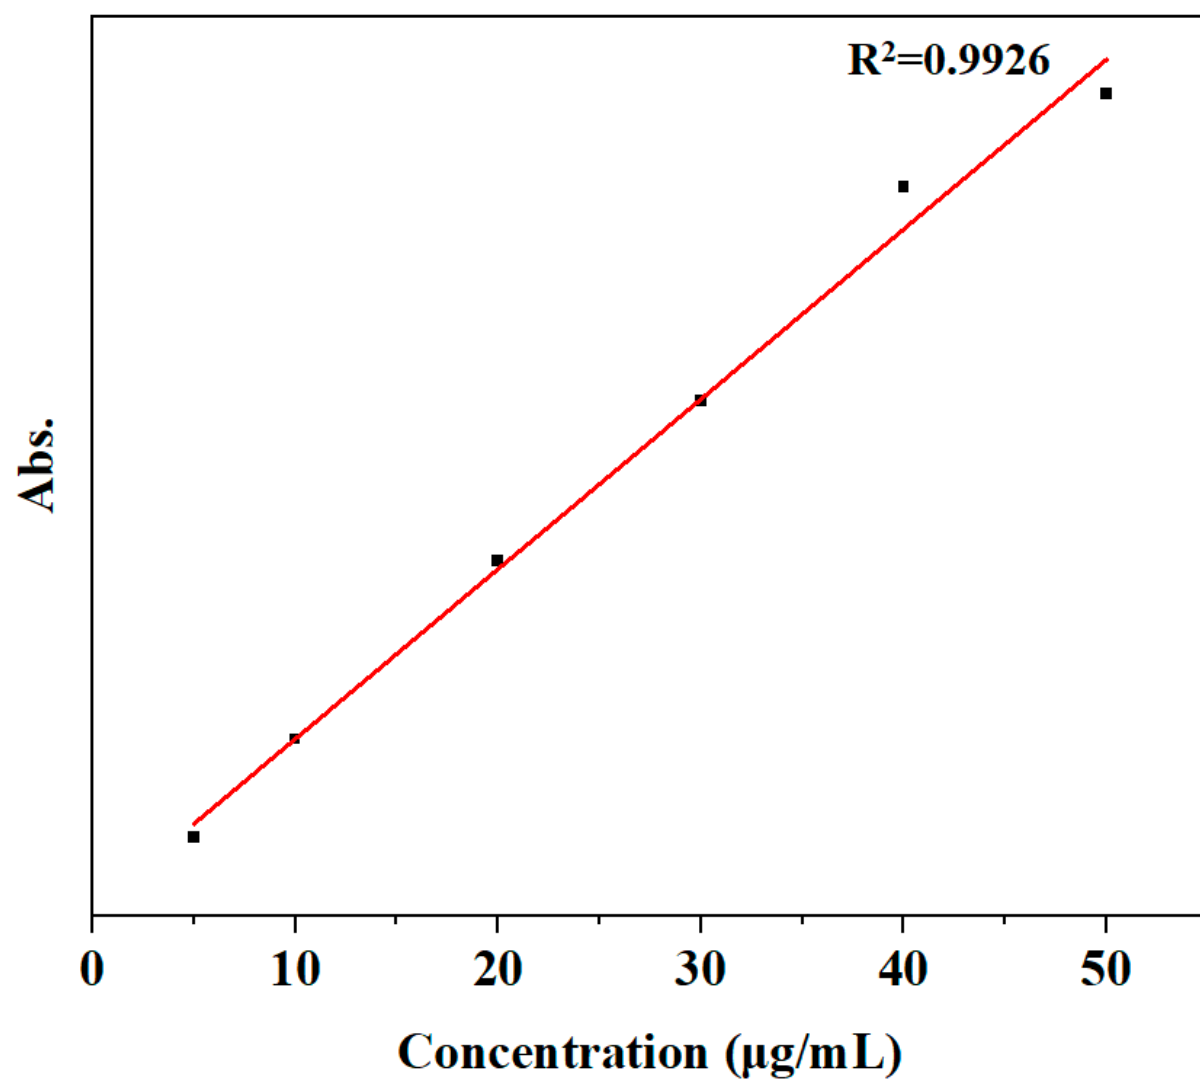

**Figure S3.** Standard curve of MA-OHE/ZnAC PE for *in vitro* drug release kinetics
